# Supplementary material for: Stress profile influences learning approach in a marine fish
Source: PeerJ. 2017 Jun 8;5:e3445. doi: 10.7717/peerj.3445 (PMC5466811; doi:10.7717/peerj.3445)
Supplement: Supplemental Information 1 [file peerj-05-3445-s001.xlsx]

## Sheet: ANOVA grp 6
Anova: Single Factor
SUMMARY
Groups	Count	Sum	Average	Variance
Row 1	16	40	2.5	13.8667
Row 2	16	50	3.125	15.3167
Row 3	16	346	21.625	1127.18
Row 4	16	3	0.1875	0.1625
Row 5	16	1	0.0625	0.0625
Row 6	16	18	1.125	6.51667
ANOVA
Source of Variation	SS	df	MS	F	P-value	F crit
Between Groups	5574.33	5	1114.87	5.75114	0.000118873	2.31569
Within Groups	17446.6	90	193.851
Total	23021	95

## Sheet: ANOVA grp 5
Anova: Single Factor
SUMMARY
Groups	Count	Sum	Average	Variance
Row 1	17	433	25.4706	1668.51
Row 2	17	51	3	41.25
Row 3	17	1729	101.706	4717.22
Row 4	17	15	0.882353	1.98529
Row 5	17	4	0.235294	0.441176
Row 6	17	1	0.0588235	0.0588235
ANOVA
Source of Variation	SS	df	MS	F	P-value	F crit
Between Groups	138160	5	27632.1	25.7863	2.05533e-16	2.3092
Within Groups	102872	96	1071.58
Total	241032	101

## Sheet: ANOVA grp 4
Anova: Single Factor
SUMMARY
Groups	Count	Sum	Average	Variance
Row 1	18	1285	71.3889	4409.31
Row 2	18	303	16.8333	390.735
Row 3	18	75	4.16667	44.5
Row 4	18	2	0.111111	0.104575
Row 5	18	135	7.5	87.3235
Row 6	18	23	1.27778	9.03595
ANOVA
Source of Variation	SS	df	MS	F	P-value	F crit
Between Groups	67418.3	5	13483.7	16.3736	7.77536e-12	2.30349
Within Groups	83997.2	102	823.502
Total	151415	107

## Sheet: ANOVA grp 3
Anova: Single Factor
SUMMARY
Groups	Count	Sum	Average	Variance
Row 1	20	179	8.95	168.471
Row 2	20	123	6.15	129.292
Row 3	20	18	0.9	1.67368
Row 4	20	173	8.65	123.608
Row 5	20	155	7.75	129.566
Row 6	20	24	1.2	9.74737
ANOVA
Source of Variation	SS	df	MS	F	P-value	F crit
Between Groups	1338	5	267.6	2.85512	0.0181801	2.29391
Within Groups	10684.8	114	93.7263
Total	12022.8	119

## Sheet: ANOVA grp 2
Anova: Single Factor
SUMMARY
Groups	Count	Sum	Average	Variance
dd621b	20	638	31.9	666.832
dfabbe	20	514	25.7	2096.85
dd77f0	20	366	18.3	661.484
dd16a4	20	219	10.95	245.945
dd6941	20	292	14.6	161.937
dd8431	20	241	12.05	306.471
ANOVA
Source of Variation	SS	df	MS	F	P-value	F crit
Between Groups	6884.27	5	1376.85	1.99567	0.0845134	2.29391
Within Groups	78650.9	114	689.92
Total	85535.2	119

## Sheet: ANOVA grp 1
Anova: Single Factor
SUMMARY
Groups	Count	Sum	Average	Variance
dd8177	12	1326	110.5	6401.36
dfa0e6	12	568	47.3333	877.152
dd9cb1	12	413	34.4167	1208.27
df9b10	12	288	24	195.273
df8c72	12	232	19.3333	339.879
dfa770	12	394	32.8333	598.333
ANOVA
Source of Variation	SS	df	MS	F	P-value	F crit
Between Groups	67861.1	5	13572.2	8.46476	3.12378e-06	2.35381
Within Groups	105823	66	1603.38
Total	173684	71

## Sheet: T-test learning index
t-Test: Two-Sample Assuming Unequal Variances
	Bold	Shy
Mean	19.1273	7.22914
Variance	691.953	222.309
Observations	12	18
Hypothesized Mean Difference	0
df	16
t Stat	1.42197
P(T<=t) one-tail	0.0871178
t Critical one-tail	1.74588
P(T<=t) two-tail	0.174236
t Critical two-tail	2.11991

## Sheet: Sheet1
Bold/Shy	Group	Reader	Tag ID	1	2	3	4	5	6	7	8	9	10	11	12	13	14	15	16	17	18	19	20	Tot. Mean	Mean	Half life	Learning Index	LOG			Day	Total recordings
Bold	1	1	dd8177	93	55	274	184	60	246	108	46	33	81	81	65									1	110.5	663	132.6	2.12254	Bold
Int	1	1	dfa0e6	95	98	63	35	52	72	46	13	8	27	28	31									1	47.3333	284	71	1.85126	Shy
Bold	1	1	dd9cb1	114	49	7	6	28	3	1	4	22	62	63	54									1	34.4167	206.5	25.8125	1.41183
Bold	1	1	df9b10	6	29	29	4	40	18	38	7	11	38	38	30									1	24	144	20.5714	1.31326
Bold	1	1	df8c72	4	6	73	6	14	26	21	13	12	24	22	11									1	19.3333	116	19.3333	1.28631																		Bold
Bold	1	1	dfa770	6	9	73	17	16	38	61	31	38	15	16	74									1	32.8333	197	24.625	1.39138																		Bold
				318	564	1083	1335	1545	1948	2223	2337	2461	2708	2956	3221									Tot. Mean	44.7361																					Shy
Bold	1	2	dd8177	0	0	0	0	0	0	0	0	0	0	0	3									12	0.25																					Shy
Int	1	2	dfa0e6	0	0	0	0	0	0	0	0	0	22	79	32									10	11.0833		10.706																			Shy
Bold	1	2	dd9cb1	0	0	0	0	0	0	0	0	3	3	1	0									9	0.583333		2.67649
Bold	1	2	df9b10	0	0	0	0	0	0	0	0	0	0	0	1									13	0.0833333
Bold	1	2	df8c72	0	0	0	0	0	0	0	0	0	0	0	0									13	0
Bold	1	2	dfa770	0	0	0	0	0	0	0	0	0	0	10	0									11	0.833333
				0	0	0	0	0	0	0	0	3	28	118	154									Tot. Mean	2.13889
Bold	2	1	dd621b	3	1	43	34	32	30	84	42	25	33	31	5	5	45	15	6	21	83	81	19	1	30.4286	319	31.9	1.50379
Bold	2	1	dfabbe	0	2	1	60	7	7	6	8	1	0	3	1	1	0	0	13	147	140	81	36	3	24.619	257	15.1176	1.17948
Bold	2	1	dd77f0	0	1	1	15	65	100	44	40	10	11	7	0	6	18	21	6	9	0	9	3	4	17.619	183	26.1429	1.41735
Bold	2	1	dd16a4	0	0	0	46	4	47	30	33	1	4	0	1	1	0	0	7	5	10	8	22	4	10.619	109.5	15.6429	1.19432
Bold	2	1	dd6941	0	0	0	12	24	21	40	41	7	11	7	0	4	20	10	17	29	24	21	4	4	14.0952	146	14.6	1.16435
Bold	2	1	dd8431	0	0	0	16	4	0	2	18	50	46	4	0	0	11	0	38	43	9	0	0	4	11.6667	120.5	12.05	1.08099
			Left side (food)	3	7	52	235	371	576	782	964	1058	1163	1215	1222	1239	1333	1379	1466	1720	1986	2186	2270	Tot. Mean	18.9167
Bold	2	2	dd621b	0	7	3	15	0	0	8	6	7	2	0	0	3	0	0	0	2	0	1	1	2	2.71429	27.5
Bold	2	2	dfabbe	0	0	0	0	0	0	0	2	0	0	0	0	0	0	0	0	0	1	0	1	18	1.04762	2
Bold	2	2	dd77f0	1	0	11	18	11	2	20	0	2	1	1	0	0	0	7	1	0	1	4	0	3	3.95238	40
Bold	2	2	dd16a4	0	0	0	1	0	0	0	0	0	0	0	0	0	0	0	0	0	0	1	0	19	1	1
Bold	2	2	dd6941	0	0	0	0	1	25	0	2	0	0	0	0	0	0	0	1	0	0	0	0	6	1.66667	14.5
Bold	2	2	dd8431	0	4	0	0	32	1	0	0	0	0	4	0	0	4	0	2	3	1	12	4	2	3.28571	33.5
			Right side (no food)	1	12	26	60	104	132	160	170	179	182	187	187	190	194	201	205	210	213	231	237	Tot. Mean	1.975
Shy	3	1	dd653d	4	7	19	1	0	0	0	0	0	9	16	0	0	2	16	0	8	13	45	39	1	8.57143	89.5	4.97222	0.696551
Shy	3	1	df9ec4	2	0	1	0	0	1	0	0	0	1	0	34	0	39	18	8	5	4	10	0	3	6	61.5	4.39286	0.642747
Shy	3	1	dd8293	3	2	1	0	0	0	0	0	0	0	3	0	2	1	0	0	0	4	0	2	1	0.904762	9	0.818182	-0.0871502
Shy	3	1	dd0c9b	0	0	2	0	2	1	0	0	0	0	0	23	1	23	11	18	19	29	31	13	5	8.47619	86.5	5.08824	0.706567
Shy	3	1	dd7f51	0	0	0	0	0	1	0	0	0	0	0	19	1	8	25	13	10	38	13	27	12	7.95238	77.5	4.30556	0.634029
Shy	3	1	dd9c17	0	0	0	0	0	0	0	0	0	0	1	3	1	2	1	0	1	14	1	0	12	1.71429	12	0.666667	-0.176091
			Left side (food)	9	18	41	42	44	47	47	47	47	57	77	156	161	236	307	346	389	491	591	672	Tot. Mean	5.6
Shy	3	2	dd653d	1	1	6	0	0	0	0	0	4	11	51	25	16	20	54	16	26	44	18	2	3	14.1905	147.5
Shy	3	2	df9ec4	0	0	0	0	0	0	0	0	0	0	0	0	0	0	0	0	0	4	0	0	18	1.04762	2
Shy	3	2	dd8293	0	0	1	0	0	2	1	1	0	0	0	0	0	0	0	0	4	0	0	0	6	0.714286	4.5
Shy	3	2	dd0c9b	0	0	0	0	0	0	0	0	0	0	1	0	5	0	1	3	1	1	1	6	13	1.52381	9.5
Shy	3	2	dd7f51	0	0	0	0	0	0	0	0	0	0	0	0	0	1	3	0	14	53	0	6	15	4.38095	38.5
Shy	3	2	dd9c17	0	0	0	0	0	0	0	0	0	0	0	0	0	0	0	0	0	1	0	0	21	1.04762	0.5
			Right side (no food)	1	2	9	9	9	11	12	13	17	28	80	105	126	147	205	224	269	372	391	405	Tot. Mean	3.375
Shy	4	1	dd8fd7	10	28	31	0	2	0	84	124	123	266	22	48	74	88	145	78	93	69			1	67.6842	642.5	64.25	1.80787
Shy	4	1	dfb4b6	0	7	22	3	1	1	1	2	1	46	46	40	14	37	60	6	12	4			2	16.0526	151.5	12.625	1.10123																				a
Shy	4	1	dd3027	0	6	19	0	1	0	0	1	2	0	4	0	4	2	24	3	3	6			2	4.05263	37.5	2.67857	0.427903
Shy	4	1	dd6940	0	0	1	0	0	0	0	0	0	0	1	0	0	0	0	0	0	0			19	1.10526	1	0.33	-0.481486
Shy	4	1	dfb901	0	1	0	0	0	0	2	3	3	9	8	4	8	14	33	18	24	8			7	7.47368	67.5	4.5	0.653213
Shy	4	1	dd412e	0	0	0	0	0	0	0	0	0	2	3	0	1	0	12	0	0	5			11	1.78947	11.5	0.766667	-0.115393
			Left side (food)	10	52	125	128	132	133	220	350	479	802	886	978	1079	1220	1494	1599	1731	1823			Tot. Mean	16.8796
Shy	4	2	dd8fd7	0	0	0	2	2	0	0	0	0	0	0	0	0	0	1	0	1	0			5	0.578947	3
Shy	4	2	dfb4b6	0	2	0	0	0	0	0	0	0	0	0	0	0	0	0	0	0	0			19	1.10526	1
Shy	4	2	dd3027	0	0	0	0	0	0	0	0	0	0	0	0	0	0	0	0	3	0			17	1.05263	1.5
Shy	4	2	dd6940	0	0	0	0	0	0	0	0	0	0	0	0	0	0	0	0	0	0			19	1	0
Shy	4	2	dfb901	0	0	1	0	2	0	1	0	0	0	0	0	0	0	0	0	0	0			5	0.473684	2
Shy	4	2	dd412e	0	0	0	0	0	3	0	0	0	0	0	0	0	0	0	0	0	0			6	0.473684	1.5
			Right side (no food)	0	2	3	5	9	12	13	13	13	13	13	13	13	13	14	14	18	18			Tot. Mean	0.166667
Bold	5	1	dd9a13	0	1	0	1	1	0	1	0	0	0	3	17	103	106	100	67	33				5	25.4706	216.5	15.4643	1.18933
Bold	5	1	dd9246	0	4	0	0	0	0	0	0	0	0	0	0	0	13	12	0	22				2	3	25.5	1.7	0.230449
Bold	5	1	dd6a1a	0	6	34	54	221	251	76	159	73	112	108	121	164	121	91	89	49				2	101.706	864.5	96.0556	1.98252
Bold	5	1	df8751	0	0	0	0	0	2	0	0	0	2	0	0	0	4	1	2	4				10	0.882353	7.5	0.535714	-0.271067
Bold	5	1	dd987c	0	0	0	0	0	0	2	0	0	0	0	0	2	0	0	0	0				13	0.235294	2	0.285714	-0.544068
Bold	5	1	dd76df	0	0	0	0	0	0	0	0	0	0	0	0	0	0	1	0	0				19	0.0588235	0.5	0.0333333	-1.47712
			Left side (food)	0	11	45	100	322	575	654	813	886	1000	1111	1249	1518	1762	1967	2125	2233				Tot. Mean	21.8922
Bold	5	2	dd9a13	0	0	0	0	0	0	0	0	0	0	0	0	0	0	0	0	0				20	0	0
Bold	5	2	dd9246	0	0	0	0	0	0	0	1	0	0	0	0	0	0	0	1	0				18	0.117647	1
Bold	5	2	dd6a1a	1	1	4	6	2	0	0	0	0	0	1	15	9	2	3	1	0				3	2.64706	22.5
Bold	5	2	df8751	0	5	0	0	0	0	0	0	0	0	0	0	0	0	0	0	0				2	0.294118	2.5
Bold	5	2	dd987c	0	0	0	0	0	0	0	0	0	2	0	0	1	0	0	0	0				13	0.176471	1.5
Bold	5	2	dd76df	0	0	0	0	0	2	0	2	0	0	0	0	0	0	0	0	0				8	0.235294	2
			Right side (no food)	1	7	11	17	19	21	21	24	24	26	27	42	52	54	57	59	59				Tot. Mean	0.578431
Shy	6	1	dd394b	3	0	10	2	2	2	0	0	2	0	1	0	3	13	0	2					1	2.5	20	2.22222	0.346787
Shy	6	1	dd73ba	3	1	1	13	12	6	1	1	2	3	2	1	1	2	1	0					1	3.125	25	4.9	0.690196
Shy	6	1	dd95fd	0	0	10	8	3	14	17	8	57	131	50	8	9	24	1	6					3	21.625	173	16.9	1.22789
Shy	6	1	df83fc	0	0	0	1	0	0	0	1	0	1	0	0	0	0	0	0					10	0.1875	1.5	0.1875	-0.726999
Shy	6	1	df9436	0	0	0	1	0	0	0	0	0	0	0	0	0	0	0	0					19	0.0625	0.5	0.0625	-1.20412
Shy	6	1	dd9c15	0	0	0	0	0	0	0	1	0	0	0	8	7	0	2	0					12	1.125	9	0.458333	-0.338819
			Left side (food)	6	7	28	53	70	92	110	121	182	317	370	387	407	446	450	458					Tot. Mean	4.77083
Shy	6	2	dd394b	1	2	0	0	0	0	1	0	0	0	0	0	0	0	0	0					2	0.25	2
Shy	6	2	dd73ba	1	1	1	2	0	2	4	0	17	5	2	1	0	0	1	0					3	2.3125	18.5
Shy	6	2	dd95fd	1	0	0	1	0	0	0	0	0	0	0	0	0	0	0	0					19	0.125	1
Shy	6	2	df83fc	0	2	0	1	0	0	0	0	0	0	0	0	0	0	0	0					4	0.1875	1.5
Shy	6	2	df9436	0	0	0	0	0	0	0	0	0	0	0	0	0	0	0	0					19	0	0
Shy	6	2	dd9c15	0	0	0	0	0	0	0	0	0	0	0	0	0	0	0	0					20	0	0
			Right side (no food)	3	8	9	13	13	15	20	20	37	42	44	45	45	45	46	46					Tot. Mean	0.479167
			Day	1	2	3	4	5	6	7	8	9	10	11	12	13	14	15	16
			Low stress rewarded	107	194	393.333	556.667	746	1033	1219.67	1371.33	1468.33	1623.67	1760.67	1897.33	1378.5	1547.5	1673	1795.5	105.504	185.004	344.839	391.113	399.75	457.5	503.026	484.797	498.811	544.205	598.42	661.879	139.5	214.5	294	329.5
			Low stress unrewarded	0.666667	6.33333	12.3333	25.6667	41	51	60.3333	64.6667	68.6667	78.6667	110.667	127.667	121	124	129	132	0.333333	3.4801	7.5351	17.8543	31.9739	40.9512	50.2007	53.1204	55.4987	51.6699	46.3333	43.8799	69	70	72	73
			High stress rewarded	8.33333	25.6667	64.6667	74.3333	82	90.6667	125.667	172.667	236	392	444.333	507	549	634	750.333	801	1.04083	11.7296	26.3265	23.4005	22.6053	21.5078	43.7788	78.9847	110.502	189.06	204.795	211.968	237.594	259.12	323.995	346.677
			High stress unrewarded	1.33333	4	7	9	10.3333	12.6667	15	15.3333	22.3333	27.6667	45.6667	54.3333	61.3333	68.3333	88.3333	94.6667	0.881917	2	2	2.3094	1.33333	1.20185	2.51661	2.33333	7.42369	8.37324	19.3592	26.965	33.627	40.4035	59.0602	65.3231

## Sheet: Sheet4
Bold/Shy	Group	Reader	Tag ID	Day 1	Day 2	Day 3	Day 4	Day 5	Day 6	Day 7	Day 8	Day 9	Day 10	Day 11	Day 12
Bold	1	Correct	dd8177	93	148	422	606	666	912	1020	1066	1099	1180	1261	1326	1.97772	2.17609	2.62737	2.7839	2.82478	2.96095	3.00945	3.02857	3.04179	3.07262	3.1014	3.1232
Bold	1	Correct	dd9cb1	114	163	170	176	204	207	208	212	234	296	359	413	2.06446	2.21748	2.23553	2.25042	2.31387	2.32015	2.32222	2.33041	2.37291	2.47422	2.55751	2.61805
Bold	1	Correct	df9b10	6	35	64	68	108	126	164	171	182	220	258	288	0.90309	1.5682	1.81954	1.8451	2.04139	2.10721	2.22011	2.23805	2.26482	2.34635	2.41497	2.4624
Bold	1	Correct	df8c72	4	10	83	89	103	129	150	163	175	199	221	232	0.778151	1.07918	1.92942	1.95904	2.02119	2.11727	2.18184	2.21748	2.24797	2.3032	2.3483	2.36922
Bold	1	Correct	dfa770	6	15	88	105	121	159	220	251	289	304	320	394	0.90309	1.23045	1.95424	2.02938	2.08991	2.20683	2.34635	2.40312	2.46389	2.48572	2.50786	2.5977
Bold	1	Incorrect	dd8177	0	0	0	0	0	0	0	0	0	0	0	3	0.30103	0.30103	0.30103	0.30103	0.30103	0.30103	0.30103	0.30103	0.30103	0.30103	0.30103	0.69897
Bold	1	Incorrect	dd9cb1	0	0	0	0	0	0	0	0	3	6	7	7	0.30103	0.30103	0.30103	0.30103	0.30103	0.30103	0.30103	0.30103	0.69897	0.90309	0.954243	0.954243
Bold	1	Incorrect	df9b10	0	0	0	0	0	0	0	0	0	0	0	1	0.30103	0.30103	0.30103	0.30103	0.30103	0.30103	0.30103	0.30103	0.30103	0.30103	0.30103	0.477121
Bold	1	Incorrect	df8c72	0	0	0	0	0	0	0	0	0	0	0	0	0.30103	0.30103	0.30103	0.30103	0.30103	0.30103	0.30103	0.30103	0.30103	0.30103	0.30103	0.30103
Bold	1	Incorrect	dfa770	0	0	0	0	0	0	0	0	0	0	10	10	0.30103	0.30103	0.30103	0.30103	0.30103	0.30103	0.30103	0.30103	0.30103	0.30103	1.07918	1.07918
Bold	2	Correct	dd621b	3	4	47	81	113	143	227	269	294	327	358	363	0.69897	0.778151	1.6902	1.91908	2.0607	2.16137	2.35984	2.43297	2.47129	2.5172	2.5563	2.56229
Bold	2	Correct	dfabbe	0	2	3	63	70	77	83	91	92	92	95	96	0.30103	0.60206	0.69897	1.81291	1.85733	1.89763	1.92942	1.96848	1.97313	1.97313	1.98677	1.99123
Bold	2	Correct	dd77f0	0	1	2	17	82	182	226	266	276	287	294	294	0.30103	0.477121	0.60206	1.27875	1.92428	2.26482	2.35793	2.42813	2.44404	2.4609	2.47129	2.47129
Bold	2	Correct	dd16a4	0	0	0	46	50	97	127	160	161	165	165	166	0.30103	0.30103	0.30103	1.68124	1.716	1.99564	2.11059	2.20952	2.21219	2.22272	2.22272	2.22531
Bold	2	Correct	dd6941	0	0	0	12	36	57	97	138	145	156	163	163	0.30103	0.30103	0.30103	1.14613	1.57978	1.77085	1.99564	2.14613	2.16732	2.19866	2.21748	2.21748
Bold	2	Correct	dd8431	0	0	0	16	20	20	22	40	90	136	140	140	0.30103	0.30103	0.30103	1.25527	1.34242	1.34242	1.38021	1.62325	1.96379	2.13988	2.15229	2.15229
Bold	2	Incorrect	dd621b	0	7	10	25	25	25	33	39	46	48	48	48	0.30103	0.954243	1.07918	1.43136	1.43136	1.43136	1.54407	1.61278	1.68124	1.69897	1.69897	1.69897
Bold	2	Incorrect	dfabbe	0	0	0	0	0	0	0	2	2	2	2	2	0.30103	0.30103	0.30103	0.30103	0.30103	0.30103	0.30103	0.60206	0.60206	0.60206	0.60206	0.60206
Bold	2	Incorrect	dd77f0	1	1	12	30	41	43	63	63	65	66	67	67	0.477121	0.477121	1.14613	1.50515	1.63347	1.65321	1.81291	1.81291	1.82607	1.83251	1.83885	1.83885
Bold	2	Incorrect	dd16a4	0	0	0	1	1	1	1	1	1	1	1	1	0.30103	0.30103	0.30103	0.477121	0.477121	0.477121	0.477121	0.477121	0.477121	0.477121	0.477121	0.477121
Bold	2	Incorrect	dd6941	0	0	0	0	1	26	26	28	28	28	28	28	0.30103	0.30103	0.30103	0.30103	0.477121	1.44716	1.44716	1.47712	1.47712	1.47712	1.47712	1.47712
Bold	2	Incorrect	dd8431	0	4	4	4	36	37	37	37	37	37	41	41	0.30103	0.778151	0.778151	0.778151	1.57978	1.59106	1.59106	1.59106	1.59106	1.59106	1.63347	1.63347
Shy	3	Correct	dd653d	4	11	30	31	31	31	31	31	31	40	56	56	0.778151	1.11394	1.50515	1.51851	1.51851	1.51851	1.51851	1.51851	1.51851	1.62325	1.76343	1.76343
Shy	3	Correct	df9ec4	2	2	3	3	3	4	4	4	4	5	5	39	0.60206	0.60206	0.69897	0.69897	0.69897	0.778151	0.778151	0.778151	0.778151	0.845098	0.845098	1.61278
Shy	3	Correct	dd8293	3	5	6	6	6	6	6	6	6	6	9	9	0.69897	0.845098	0.90309	0.90309	0.90309	0.90309	0.90309	0.90309	0.90309	0.90309	1.04139	1.04139
Shy	3	Correct	dd0c9b	0	0	2	2	4	5	5	5	5	5	5	28	0.30103	0.30103	0.60206	0.60206	0.778151	0.845098	0.845098	0.845098	0.845098	0.845098	0.845098	1.47712
Shy	3	Correct	dd7f51	0	0	0	0	0	1	1	1	1	1	1	20	0.30103	0.30103	0.30103	0.30103	0.30103	0.477121	0.477121	0.477121	0.477121	0.477121	0.477121	1.34242
Shy	3	Correct	dd9c17	0	0	0	0	0	0	0	0	0	0	1	4	0.30103	0.30103	0.30103	0.30103	0.30103	0.30103	0.30103	0.30103	0.30103	0.30103	0.477121	0.778151
Shy	3	Incorrect	dd653d	1	2	8	8	8	8	8	8	12	23	74	99	0.477121	0.60206	1	1	1	1	1	1	1.14613	1.39794	1.88081	2.00432
Shy	3	Incorrect	df9ec4	0	0	0	0	0	0	0	0	0	0	0	0	0.30103	0.30103	0.30103	0.30103	0.30103	0.30103	0.30103	0.30103	0.30103	0.30103	0.30103	0.30103
Shy	3	Incorrect	dd8293	0	0	1	1	1	3	4	5	5	5	5	5	0.30103	0.30103	0.477121	0.477121	0.477121	0.69897	0.778151	0.845098	0.845098	0.845098	0.845098	0.845098
Shy	3	Incorrect	dd0c9b	0	0	0	0	0	0	0	0	0	0	1	1	0.30103	0.30103	0.30103	0.30103	0.30103	0.30103	0.30103	0.30103	0.30103	0.30103	0.477121	0.477121
Shy	3	Incorrect	dd7f51	0	0	0	0	0	0	0	0	0	0	0	0	0.30103	0.30103	0.30103	0.30103	0.30103	0.30103	0.30103	0.30103	0.30103	0.30103	0.30103	0.30103
Shy	3	Incorrect	dd9c17	0	0	0	0	0	0	0	0	0	0	0	0	0.30103	0.30103	0.30103	0.30103	0.30103	0.30103	0.30103	0.30103	0.30103	0.30103	0.30103	0.30103
Shy	4	Correct	dd8fd7	10	38	69	69	71	71	155	279	402	668	690	738	1.07918	1.60206	1.85126	1.85126	1.86332	1.86332	2.1959	2.44871	2.60638	2.82607	2.84011	2.86923
Shy	4	Correct	dfb4b6	0	7	29	32	33	34	35	37	38	84	130	170	0.30103	0.954243	1.49136	1.53148	1.54407	1.5563	1.5682	1.59106	1.60206	1.9345	2.12057	2.23553
Shy	4	Correct	dd3027	0	6	25	25	26	26	26	27	29	29	33	33	0.30103	0.90309	1.43136	1.43136	1.44716	1.44716	1.44716	1.4624	1.49136	1.49136	1.54407	1.54407
Shy	4	Correct	dd6940	0	0	1	1	1	1	1	1	1	1	2	2	0.30103	0.30103	0.477121	0.477121	0.477121	0.477121	0.477121	0.477121	0.477121	0.477121	0.60206	0.60206
Shy	4	Correct	dfb901	0	1	1	1	1	1	3	6	9	18	26	30	0.30103	0.477121	0.477121	0.477121	0.477121	0.477121	0.69897	0.90309	1.04139	1.30103	1.44716	1.50515
Shy	4	Correct	dd412e	0	0	0	0	0	0	0	0	0	2	5	5	0.30103	0.30103	0.30103	0.30103	0.30103	0.30103	0.30103	0.30103	0.30103	0.60206	0.845098	0.845098
Shy	4	Incorrect	dd8fd7	0	0	0	2	4	4	4	4	4	4	4	4	0.30103	0.30103	0.30103	0.60206	0.778151	0.778151	0.778151	0.778151	0.778151	0.778151	0.778151	0.778151
Shy	4	Incorrect	dfb4b6	0	2	2	2	2	2	2	2	2	2	2	2	0.30103	0.60206	0.60206	0.60206	0.60206	0.60206	0.60206	0.60206	0.60206	0.60206	0.60206	0.60206
Shy	4	Incorrect	dd3027	0	0	0	0	0	0	0	0	0	0	0	0	0.30103	0.30103	0.30103	0.30103	0.30103	0.30103	0.30103	0.30103	0.30103	0.30103	0.30103	0.30103
Shy	4	Incorrect	dd6940	0	0	0	0	0	0	0	0	0	0	0	0	0.30103	0.30103	0.30103	0.30103	0.30103	0.30103	0.30103	0.30103	0.30103	0.30103	0.30103	0.30103
Shy	4	Incorrect	dfb901	0	0	1	1	3	3	4	4	4	4	4	4	0.30103	0.30103	0.477121	0.477121	0.69897	0.69897	0.778151	0.778151	0.778151	0.778151	0.778151	0.778151
Shy	4	Incorrect	dd412e	0	0	0	0	0	3	3	3	3	3	3	3	0.30103	0.30103	0.30103	0.30103	0.30103	0.69897	0.69897	0.69897	0.69897	0.69897	0.69897	0.69897
Bold	5	Correct	dd9a13	0	1	1	2	3	3	4	4	4	4	7	24	0.30103	0.477121	0.477121	0.60206	0.69897	0.69897	0.778151	0.778151	0.778151	0.778151	0.954243	1.41497
Bold	5	Correct	dd9246	0	4	4	4	4	4	4	4	4	4	4	4	0.30103	0.778151	0.778151	0.778151	0.778151	0.778151	0.778151	0.778151	0.778151	0.778151	0.778151	0.778151
Bold	5	Correct	dd6a1a	0	6	40	94	315	566	642	801	874	986	1094	1215	0.30103	0.90309	1.62325	1.98227	2.50106	2.75435	2.80889	2.90472	2.9425	2.99476	3.03981	3.08529
Bold	5	Correct	df8751	0	0	0	0	0	2	2	2	2	4	4	4	0.30103	0.30103	0.30103	0.30103	0.30103	0.60206	0.60206	0.60206	0.60206	0.778151	0.778151	0.778151
Bold	5	Correct	dd987c	0	0	0	0	0	0	2	2	2	2	2	2	0.30103	0.30103	0.30103	0.30103	0.30103	0.30103	0.60206	0.60206	0.60206	0.60206	0.60206	0.60206
Bold	5	Correct	dd76df	0	0	0	0	0	0	0	0	0	0	0	0	0.30103	0.30103	0.30103	0.30103	0.30103	0.30103	0.30103	0.30103	0.30103	0.30103	0.30103	0.30103
Bold	5	Incorrect	dd9a13	0	0	0	0	0	0	0	0	0	0	0	0	0.30103	0.30103	0.30103	0.30103	0.30103	0.30103	0.30103	0.30103	0.30103	0.30103	0.30103	0.30103
Bold	5	Incorrect	dd9246	0	0	0	0	0	0	0	1	1	1	1	1	0.30103	0.30103	0.30103	0.30103	0.30103	0.30103	0.30103	0.477121	0.477121	0.477121	0.477121	0.477121
Bold	5	Incorrect	dd6a1a	1	2	6	12	14	14	14	14	14	14	15	30	0.477121	0.60206	0.90309	1.14613	1.20412	1.20412	1.20412	1.20412	1.20412	1.20412	1.23045	1.50515
Bold	5	Incorrect	df8751	0	5	5	5	5	5	5	5	5	5	5	5	0.30103	0.845098	0.845098	0.845098	0.845098	0.845098	0.845098	0.845098	0.845098	0.845098	0.845098	0.845098
Bold	5	Incorrect	dd987c	0	0	0	0	0	0	0	0	0	2	2	2	0.30103	0.30103	0.30103	0.30103	0.30103	0.30103	0.30103	0.30103	0.30103	0.60206	0.60206	0.60206
Bold	5	Incorrect	dd76df	0	0	0	0	0	2	2	4	4	4	4	4	0.30103	0.30103	0.30103	0.30103	0.30103	0.60206	0.60206	0.778151	0.778151	0.778151	0.778151	0.778151
Shy	6	Correct	dd394b	3	3	13	15	17	19	19	19	21	21	22	22	0.69897	0.69897	1.17609	1.23045	1.27875	1.32222	1.32222	1.32222	1.36173	1.36173	1.38021	1.38021
Shy	6	Correct	dd73ba	3	4	5	18	30	36	37	38	40	43	45	46	0.69897	0.778151	0.845098	1.30103	1.50515	1.57978	1.59106	1.60206	1.62325	1.65321	1.6721	1.68124
Shy	6	Correct	dd95fd	0	0	10	18	21	35	52	60	117	248	298	306	0.30103	0.30103	1.07918	1.30103	1.36173	1.5682	1.73239	1.79239	2.07555	2.39794	2.47712	2.48855
Shy	6	Correct	df83fc	0	0	0	1	1	1	1	2	2	3	3	3	0.30103	0.30103	0.30103	0.477121	0.477121	0.477121	0.477121	0.60206	0.60206	0.69897	0.69897	0.69897
Shy	6	Correct	df9436	0	0	0	1	1	1	1	1	1	1	1	1	0.30103	0.30103	0.30103	0.477121	0.477121	0.477121	0.477121	0.477121	0.477121	0.477121	0.477121	0.477121
Shy	6	Correct	dd9c15	0	0	0	0	0	0	0	1	1	1	1	9	0.30103	0.30103	0.30103	0.30103	0.30103	0.30103	0.30103	0.477121	0.477121	0.477121	0.477121	1.04139
Shy	6	Incorrect	dd394b	1	3	3	3	3	3	4	4	4	4	4	4	0.477121	0.69897	0.69897	0.69897	0.69897	0.69897	0.778151	0.778151	0.778151	0.778151	0.778151	0.778151
Shy	6	Incorrect	dd73ba	1	2	3	5	5	7	11	11	28	33	35	36	0.477121	0.60206	0.69897	0.845098	0.845098	0.954243	1.11394	1.11394	1.47712	1.54407	1.5682	1.57978
Shy	6	Incorrect	dd95fd	1	1	1	2	2	2	2	2	2	2	2	2	0.477121	0.477121	0.477121	0.60206	0.60206	0.60206	0.60206	0.60206	0.60206	0.60206	0.60206	0.60206
Shy	6	Incorrect	df83fc	0	2	2	3	3	3	3	3	3	3	3	3	0.30103	0.60206	0.60206	0.69897	0.69897	0.69897	0.69897	0.69897	0.69897	0.69897	0.69897	0.69897
Shy	6	Incorrect	df9436	0	0	0	0	0	0	0	0	0	0	0	0	0.30103	0.30103	0.30103	0.30103	0.30103	0.30103	0.30103	0.30103	0.30103	0.30103	0.30103	0.30103
Shy	6	Incorrect	dd9c15	0	0	0	0	0	0	0	0	0	0	0	0	0.30103	0.30103	0.30103	0.30103	0.30103	0.30103	0.30103	0.30103	0.30103	0.30103	0.30103	0.30103
